# Supplementary material for: Adsorption studies of Malachite green on 5-sulphosalicylic acid doped tetraethoxysilane (SATEOS) composite material
Source: Royal Society of Chemistry journal article supplement (doi:10.1039/c5ra17838j), 2015-01-01
Supplement: c5ra17838j1.pdf [file c5ra17838j1.pdf]

**Supporting information file**  
**Adsorption studies of Malachite Green on 5-Sulphosalicylic acid Doped**  
**Tetraethoxysilane (SATEOS) Composite Material**

*Sozia Ahad, Nasarul Islam, Arshid Bashir, Suhail-ul Rehman and Altaf Hussain Pandith\**

Department of Chemistry, University of Kashmir, Srinagar-190006, Kashmir, India

**Corresponding Author:**

**Altaf Hussain Pandith**

Phone: +91-194-2424900(OFFICE)

+91-9906424293 (Mobile)

Fax: +91-194-2414049

E-mail: [altafpandit23@gmail.com](mailto:altafpandit23@gmail.com)

**Table S1** Effect of SATEOS concentration on MG adsorption Conditions: (concentration of MG solution=5ppm, pH=7)

| <b>Adsorbent dose (g)</b> | <b>% colour removed</b> |
|---------------------------|-------------------------|
| 0.2                       | 90.4                    |
| 0.4                       | 96.8                    |
| 0.6                       | 98.0                    |
| 0.8                       | 99.0                    |
| 1                         | 99.2                    |

**Table S2** Effect of SATEOS concentration on MG adsorption Conditions: (concentration of MG solution=5ppm, 10ppm,15ppm, 20ppm , pH=7)

| <b>Adsorbent dose(g)</b> | <b>% color removed</b> |              |              |              |
|--------------------------|------------------------|--------------|--------------|--------------|
|                          | <b>5ppm</b>            | <b>10ppm</b> | <b>15ppm</b> | <b>20ppm</b> |
| 0.2                      | 90.4                   | 90.2         | 90.1         | 90           |
| 0.4                      | 96.8                   | 95.4         | 95.1         | 95           |
| 0.6                      | 98                     | 97.5         | 97           | 96.8         |
| 0.8                      | 99                     | 98.6         | 98.2         | 98.1         |
| 1                        | 99.2                   | 98.8         | 98.5         | 98.2         |

**Table S3** Effect of contact time on MG adsorption conditions: (Wt. of adsorbent=0.2g, volume of dye solution taken =30ml, agitation speed=120rpm)

| Time(min) | (5ppm) $q_e$ (mg/g) | (10ppm) $q_e$ (mg/g) | (15ppm) $q_e$ (mg/g) |
|-----------|---------------------|----------------------|----------------------|
| 30        | 4.57                | 9.49                 | 14.31                |
| 45        | 4.60                | 9.52                 | 14.34                |
| 60        | 4.62                | 9.55                 | 14.37                |
| 90        | 4.67                | 9.58                 | 14.39                |
| 120       | 4.69                | 9.6                  | 14.41                |
| 150       | 4.72                | 9.63                 | 14.43                |
| 180       | 4.78                | 9.68                 | 14.44                |
| 210       | 4.78                | 9.68                 | 14.44                |
| 240       | 4.78                | 9.68                 | 14.44                |

**Table S4** Langmuir adsorption isotherm

| <b>1/C</b> | <b>30°C 1/x/m</b> | <b>40°C 1/x/m</b> | <b>50°C 1/x/m</b> |
|------------|-------------------|-------------------|-------------------|
| 0.05       | 0.062             | 0.055             | 0.05              |
| 0.06       | 0.08              | 0.072             | 0.066             |
| 0.1        | 0.14              | 0.121             | 0.1               |
| 0.2        | 0.447             | 0.25              | 0.204             |

**Table S5** Freundlich adsorption isotherm

| <b>log C</b> | <b>30°C log x/m</b> | <b>40°C log x/m</b> | <b>50°C log x/m</b> |
|--------------|---------------------|---------------------|---------------------|
| 0.698        | 0.349               | 0.6                 | 0.689               |
| 1            | 0.852               | 0.915               | 0.999               |
| 1.176        | 1.095               | 1.128               | 1.175               |
| 1.301        | 1.204               | 1.255               | 1.3                 |

**Table S6** Lagergren first order kinetics

| <b>Time(min)</b> | <b>log(qe-q)5ppm</b> | <b>log (qe-q)10ppm</b> | <b>log (qe-q)15ppm</b> |
|------------------|----------------------|------------------------|------------------------|
| 30               | -0.677               | -0.721                 | -0.886                 |
| 45               | -0.744               | -0.795                 | -1                     |
| 60               | -0.795               | -0.886                 | -1.154                 |
| 90               | -0.958               | -1                     | -1.301                 |
| 120              | -1.045               | -1.096                 | -1.522                 |
| 150              | -1.221               | -1.301                 | -2                     |

**Table S7** Pseudo second order kinetics

| <b>Time (min)</b> | <b>5ppm <math>t/q_t</math></b> | <b>10ppm <math>t/q_t</math></b> | <b>15ppm <math>t/q_t</math></b> |
|-------------------|--------------------------------|---------------------------------|---------------------------------|
| 30                | 6.56                           | 3.16                            | 2.09                            |
| 45                | 9.78                           | 4.72                            | 3.13                            |
| 60                | 12.98                          | 6.28                            | 4.17                            |
| 90                | 19.27                          | 9.39                            | 6.25                            |
| 120               | 25.58                          | 12.5                            | 8.32                            |
| 150               | 31.77                          | 15.57                           | 10.39                           |
| 180               | 37.65                          | 18.59                           | 12.46                           |



**Table S8** Values of  $\log(1-F)$  for MG adsorption at different concentrations

| <b>Time(min)</b> | <b>5ppm <math>\log(1-F)</math></b> | <b>10ppm <math>\log(1-F)</math></b> | <b>15ppm <math>\log(1-F)</math></b> |
|------------------|------------------------------------|-------------------------------------|-------------------------------------|
| 30               | -1.356                             | -1.698                              | -2                                  |
| 45               | -1.42                              | -1.769                              | -2.154                              |
| 60               | -1.468                             | -1.893                              | -2.301                              |
| 90               | -1.619                             | -1.958                              | -2.397                              |
| 120              | -1.721                             | -2.045                              | -2.522                              |
| 150              | -1.886                             | -2.221                              | -3                                  |
